# Supplementary material
Source: PubMed Central journal article supplement (PMC3911258)
Supplement: JB.01050-13_zjb999092995so1.pdf [file JB.01050-13_zjb999092995so1.pdf]

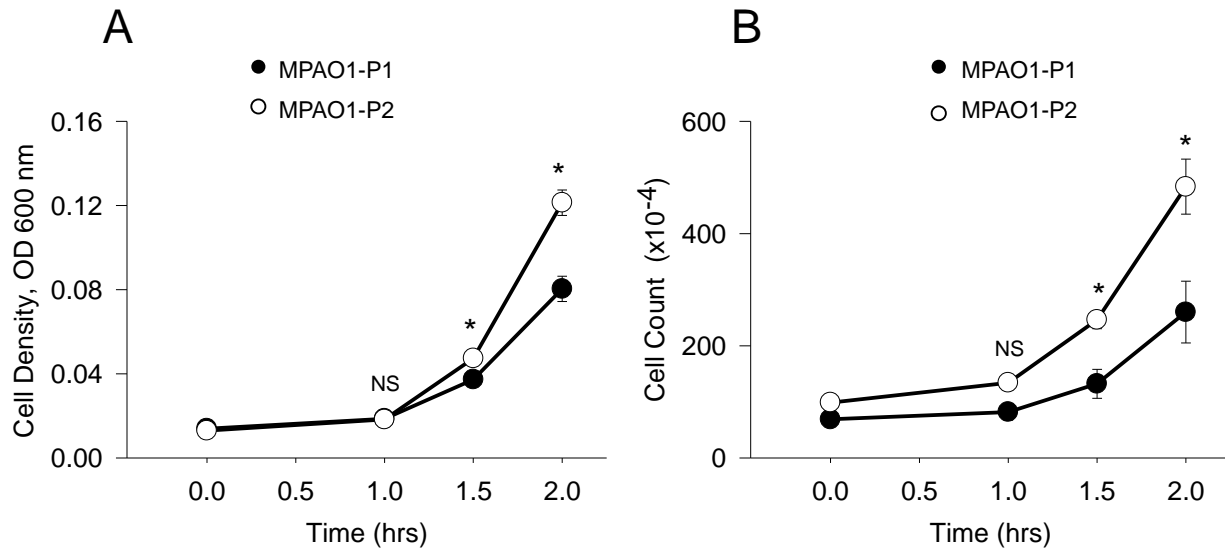

**Supplemental Fig.S1. P2 demonstrates an earlier transition from lag to log phase.**

(A) Growth of P1 and P2 at early time points as determined by OD 600 nm. n=3,

\*p<0.05. (B) Number of colony forming units (CFU) per 50  $\mu$ l of culture at early time points as determined from dilution plates. n=3,\*p<0.05.
