# Supplementary material
Source: PubMed Central journal article supplement (PMC3911258)
Supplement: JB.01050-13_zjb999092995so2.pdf [file JB.01050-13_zjb999092995so2.pdf]

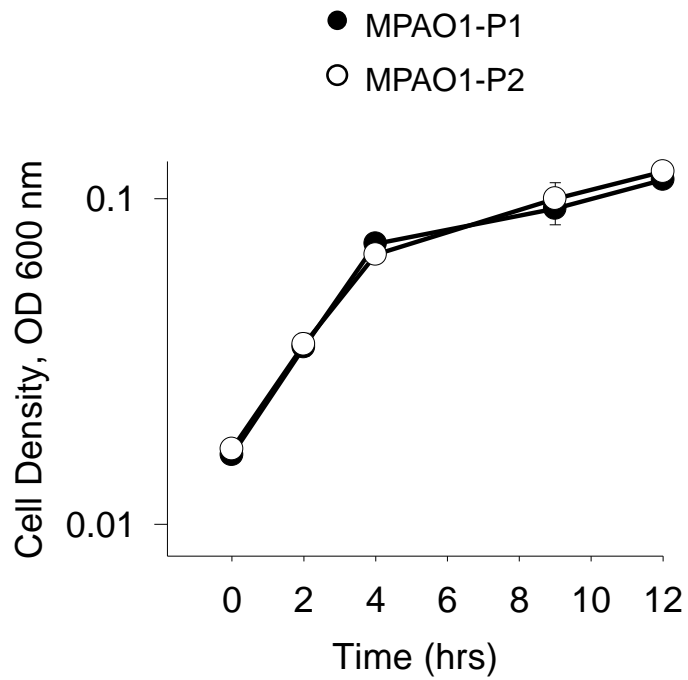

**Supplemental Fig.S2. P1 and P2 have similar growth in minimal media. P1 and P2 grown in 0.1xTY in a 96-well plate. n=3.**
