# Supplementary material
Source: PubMed Central journal article supplement (PMC3911258)
Supplement: JB.01050-13_zjb999092995so3.pdf [file JB.01050-13_zjb999092995so3.pdf]

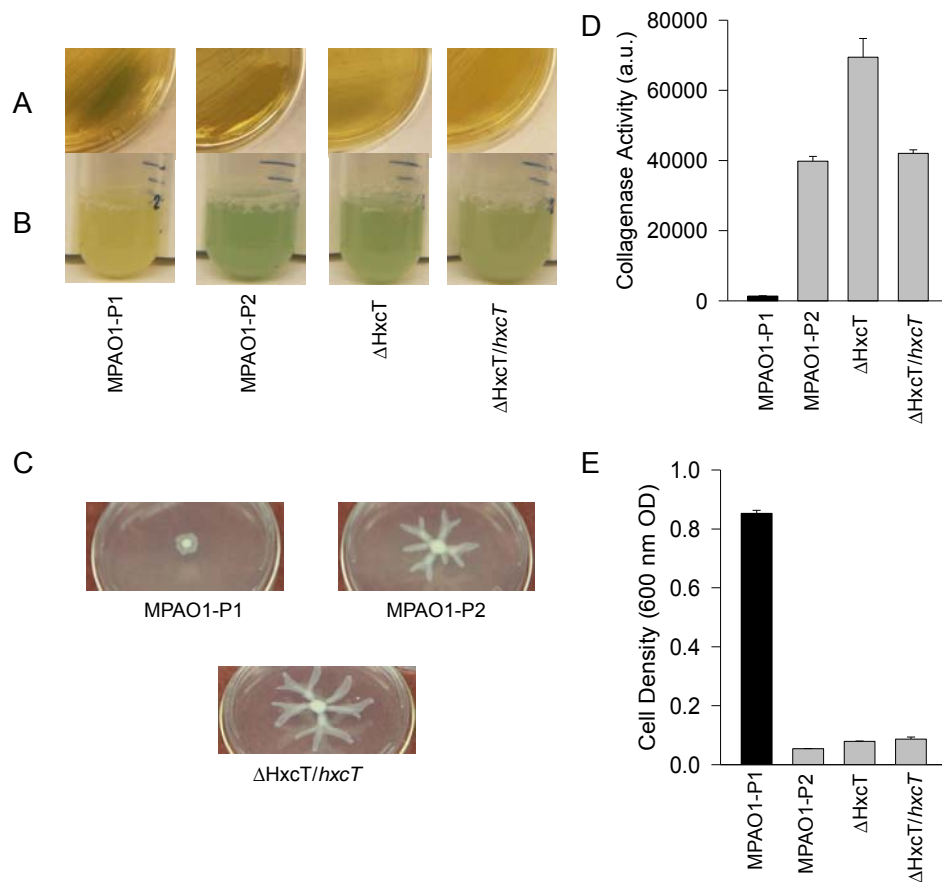

**Supplemental Fig.S3.  $\Delta$ hxcT/hxcT retains P2 phenotype.** (A,B) Pyocyanin production on (A) TSB agar and (B) liquid TSB. (C) Swarming motility. (D) Collagenase activity measured by degradation of fluorescent labeled gelatin. n=3, p<0.01 for all P2-like strains compared to P1-like strains. (E) Resistance to chloramphenicol. Cell density was measured in overnight cultures grown in TSB containing 500  $\mu$ g/mL chloramphenicol. n=3, p<0.01 for all P2-like strains compared to P1-like strains. P1-like phenotype strains are shown by black bars, P2-like strains – by gray bars.
