# Supplementary material
Source: PubMed Central journal article supplement (PMC3911258)
Supplement: JB.01050-13_zjb999092995so4.pdf [file JB.01050-13_zjb999092995so4.pdf]

## Supplemental Table S1. List of Primers.

|                            |                                      |
|----------------------------|--------------------------------------|
| Xba1-Ds-Red                | 5'-GCTCTAGAGATGGATAGCACTGAGAAC-3'    |
| Ds-Red-HindIII             | 5'-CCCAAGCTTGCTACTGGAACAGGTGGTGG-3'  |
| HxcT-Xba1                  | 5'-GCTCTAGAGATGGATGTCGTGCAGTTCAGC-3' |
| HxcT-HindIII               | 5'-CCCAAGCTTTCAGAGCTGCCAGGAGCCGAT-3' |
| PCR PA0681 <i>hxcT</i> -F  | 5'-ATGGATGTCGTGCAGTTCAG-3'           |
| PCR PA0681 <i>hxcT</i> -R  | 5'-AGGTACGAGCGCCAGTTG-3'             |
| qPCR PA3476 <i>rhII</i> -F | 5'-GATGGTCGAACTGGTTCGAAT-3'          |
| qPCR PA3476 <i>rhII</i> -R | 5'-TACCGGCATCAGGTCTTCAT-3'           |
| qPCR PA1432 <i>lasI</i> -F | 5'-AAAACCTGGGCTTCAGGAGT-3'           |
| qPCR PA1432 <i>lasI</i> -R | 5'-CGAGATGGAAATCGATGGTT-3'           |
| qPCR PA0996 <i>pqsA</i> -F | 5'-GGTGGACCGCGAAGGACACA-3'           |
| qPCR PA0996 <i>pqsA</i> -R | 5'-TTCGCTGGCCCGCCAGTA-3'             |
| qPCR PA2493 <i>mexE</i> -F | 5'-CACCTGATCAAGGACGAAG-3'            |
| qPCR PA2493 <i>mexE</i> -R | 5'-GCGGTAGACGGTCTTGTTGT-3'           |
| qPCR PA2494 <i>mexF</i> -F | 5'-TACGAGGAGCTGTTCAAGCA-3'           |
| qPCR PA2494 <i>mexF</i> -R | 5'-CCTGGTAGCTGGAGAACACC-3'           |
| qPCR PA4748-F              | 5'-ACAAGCAAGGCGGCATCACA-3'           |
| qPCR PA4748-R              | 5'-TGCACGGTACGCATTCCAGTGT-3'         |
| seq PA2492 <i>mexT</i> -F  | 5'-CGATCGCCTGGACACGCACC-3'           |
| seq PA2492 <i>mexT</i> -R  | 5'-GCGCGCGATCGATTTTCCCG-3'           |
| seq PA2494 <i>mexF1</i> -F | 5'-AGAAGTTCGTGCTGGTCCTG-3'           |
| seq PA2494 <i>mexF1</i> -R | 5'-GAAGATGGTTCGGGTCGTAGA-3'          |
| seq PA2494 <i>mexF2</i> -F | 5'-ACCAGCTTCCAGTTGTGAT-3'            |
| seq PA2494 <i>mexF2</i> -R | 5'-GGCCTTGGTGTGATGATGTTCT-3'         |
| seq PA2494 <i>mexF3</i> -F | 5'-TACTTCGGCTTCTCCAGCAC-3'           |
| seq PA2494 <i>mexF3</i> -R | 5'-CTTCCTCCTGCTTGTCCTTG-3'           |
| seq PA2494 <i>mexF4</i> -F | 5'-GCTCGGTGTTCTCCAGCTAC-3'           |
| seq PA2494 <i>mexF5</i> -F | 5'-CTTCATCAAGGTCAGCGACA-3'           |
| seq PA2494 <i>mexF4</i> -R | 5'-CTATCCAGGCCAAGGTCGTA-3'           |
